# Supplementary material for: The Effect of a Tropical Climate on Available Nutrient Resources to Springs in Ophiolite-Hosted, Deep Biosphere Ecosystems in the Philippines
Source: PubMed Central journal article supplement (PMC6504838; doi:10.3389/fmicb.2019.00761), 2019-05-01
Supplement: Table_1.pdf [file Table_1.pdf]

**Supplemental Table 1.** Calculated equilibrium constants for values reported in manuscript Table 2. <sup>a</sup> Equilibrium constants used in calculation of equilibrium carbon enrichment between calcite and CO<sub>2(g)</sub>, equilibrium  $\delta^{13}\text{C}$  CO<sub>2(g)</sub>. <sup>b</sup> Equilibrium carbonate oxygen isotope composition.

| Name, outflow distance | Depth below fluid surface | Notes, sample description | year         | equilibrium constant $\delta^{13}\text{C}$ ‰ <sup>a</sup> | equilibrium constant $\delta^{18}\text{O}$ ‰ <sup>b</sup> |         |
|------------------------|---------------------------|---------------------------|--------------|-----------------------------------------------------------|-----------------------------------------------------------|---------|
| <b>ML1</b>             | <b>0m</b>                 | 30 cm                     | Source sedi. | 2012                                                      | 1.00909                                                   | 1.00005 |
|                        | <b>0m</b>                 | 30 cm                     | Source sedi. | 2013                                                      | 1.00909                                                   | 1.00005 |
|                        | <b>0m</b>                 | 30 cm                     | Source sedi. | 2017                                                      | 1.00909                                                   | 1.00005 |
| <b>ML2</b>             | <b>0m</b>                 | 20 cm                     | Source sedi. | 2012                                                      | 1.00908                                                   | 1.00005 |
|                        | <b>1.5m</b>               | 10 cm                     | Spill pool   | 2012                                                      | 1.00909                                                   | 1.00005 |
|                        | <b>10m</b>                | 10 cm                     | Grey sedi.   | 2012                                                      | 1.00914                                                   | 1.00006 |
|                        | <b>10m</b>                | 10 cm                     | Carb. mound  | 2012                                                      | 1.00914                                                   | NA      |
|                        | <b>10m</b>                | 10 cm                     | Rimstone     | 2012                                                      | 1.00914                                                   | NA      |
|                        | <b>0m</b>                 | 20 cm                     | Source sedi. | 2013                                                      | 1.00908                                                   | 1.00005 |
|                        | <b>1.5m</b>               | 10 cm                     | Spill pool   | 2013                                                      | NA                                                        | NA      |
|                        | <b>10m</b>                | 10 cm                     | Grey sedi.   | 2013                                                      | 1.00927                                                   | 1.00008 |
|                        | <b>10m</b>                | 10 cm                     | Rimstone     | 2013                                                      | 1.00927                                                   | NA      |
|                        | <b>17.7m</b>              | 5 cm                      | Above apron  | 2013                                                      | NA                                                        | NA      |
|                        | <b>18.3m</b>              | 5 cm                      | Apron        | 2013                                                      | NA                                                        | NA      |
|                        | <b>19.5m</b>              | 5 cm                      | Below apron  | 2013                                                      | 1.00927                                                   | 1.00008 |
|                        | <b>0m</b>                 | 20 cm                     | Source sedi. | 2017                                                      | 1.00908                                                   | 1.00005 |
|                        | <b>1.5m</b>               | 10 cm                     | Spill pool   | 2017                                                      | 1.00910                                                   | 1.00005 |
|                        | <b>10m</b>                | 10 cm                     | Grey sedi.   | 2017                                                      | 1.00917                                                   | 1.00007 |
| <b>10m</b>             | 10 cm                     | Rimstone                  | 2017         | 1.00917                                                   | NA                                                        |         |
| <b>PB1</b>             | 10 cm                     | Main pool                 | 2012         | 1.00938                                                   | 1.00011                                                   |         |
|                        | 2 cm                      | Minor pool                | 2012         | NA                                                        | NA                                                        |         |
|                        | 0.25 cm                   | Terrace                   | 2012         | NA                                                        | NA                                                        |         |
|                        | 10 cm                     | Main pool                 | 2013         | 1.00949                                                   | 1.00013                                                   |         |
|                        | 2 cm                      | Minor pool                | 2013         | NA                                                        | NA                                                        |         |
|                        | 0.25 cm                   | Micro-terracette          | 2013         | NA                                                        | NA                                                        |         |
|                        | 0.25 cm                   | Terrace                   | 2013         | NA                                                        | NA                                                        |         |
|                        | 2 cm                      | Muddy pot                 | 2013         | NA                                                        | NA                                                        |         |
| <b>PB2</b>             | 15 cm                     | 'Star Pool' terraces      | 2012         | 1.00982                                                   | 1.00019                                                   |         |
|                        | 2 cm                      | 'Waterfall'               | 2012         | 1.00984                                                   | 1.00019                                                   |         |
|                        | 20 cm                     | 'Ice cube'                | 2012         | 1.00987                                                   | 1.00020                                                   |         |
|                        | N/A                       | Litter ref.               | 2012         | NA                                                        | NA                                                        |         |
|                        | N/A                       | Soil ref.                 | 2012         | NA                                                        | NA                                                        |         |
| <b>PB3</b>             | 5 cm                      | Main pool, red sedi.      | 2012         | 1.00945                                                   | 1.00012                                                   |         |
|                        | 3 cm                      | Minor seep, white sedi.   | 2012         | 1.00968                                                   | 1.00016                                                   |         |
| <b>MF</b>              | <b>0m</b>                 | 5 cm                      | Source sedi. | 2012                                                      | 1.00933                                                   | 1.00010 |
|                        | <b>60cm</b>               | 0.5 cm                    | Outflow      | 2012                                                      | NA                                                        | NA      |
|                        | <b>2.2m</b>               | 0.5 cm                    | Outflow      | 2012                                                      | NA                                                        | NA      |
|                        | <b>4.3m</b>               | 0.5 cm                    | Outflow      | 2012                                                      | NA                                                        | NA      |
| <b>PF1</b>             | 5 cm                      | 'Pig' pool                | 2017         | 1.00896                                                   | 1.00003                                                   |         |
| <b>PF2</b>             | 15 cm                     | 'Apron' pool              | 2017         | 1.00896                                                   | 1.00003                                                   |         |

---

|            |              |       |                       |      |         |         |
|------------|--------------|-------|-----------------------|------|---------|---------|
| <b>GS</b>  | <b>0m</b>    | 10 cm | Source exit           | 2017 | 1.00864 | 0.99996 |
|            | <b>0.5m</b>  | 10 cm | Spill pool            | 2017 | 1.00865 | 0.99997 |
|            | <b>4.5m</b>  | 3 cm  | Outflow               | 2017 | 1.00870 | 0.99998 |
|            | <b>5.0m</b>  | 2 cm  | Outflow               | 2017 | 1.00872 | 0.99998 |
|            | <b>10.3m</b> | 2 cm  | Outflow               | 2017 | 1.00875 | 0.99999 |
| <hr/>      |              |       |                       |      |         |         |
| <b>NWD</b> |              | 10 cm | Source pool carbonate | 2017 | 1.00961 | 1.00015 |
|            | <b>5m</b>    | 4 cm  | Outflow               | 2017 | 1.00941 | 1.00011 |
|            | <b>12m</b>   | 1 cm  | Outflow               | 2017 | NA      | NA      |
|            | <b>12m</b>   | 1 cm  | Black biofilm         | 2017 | NA      | NA      |
